# Supplementary material for: Human PPP1R26P1 Functions as cis-Repressive Element in Mouse Rb1
Source: PLoS One. 2013 Sep 3;8(9):e74159. doi: 10.1371/journal.pone.0074159 (PMC3760807; doi:10.1371/journal.pone.0074159)
Supplement: Table S3 — Data of next generation bisulfite sequencing. (XLSX) [file pone.0074159.s008.xlsx]

## Sheet: Tabelle1
sample	CGI	run_MID	% methylation	reads	conversion rate
D3	146	34_1	2.1	1060	96.2
D3	146	34_17	2.1	782	96.1
Rb1_SNPneo #197	146	34_2	1.6	1559	96.2
Rb1_SNPneo #197	146	34_18	1.3	1744	95.9
Rb1_SNP #3	146	34_3	2.2	791	96.4
Rb1_SNP #3	146	34_19	1.8	1709	96.2
Rb1_SNP #9	146	34_4	1.5	1233	96.5
Rb1_SNP #9	146	34_20	2	1877	96.1
Rb1_KIAAneo #2	146	34_5	2.2	465	97.5
Rb1_KIAAneo #2	146	34_21	2.4	898	95.8
Rb1_KIAA II-13	146	34_6	0.9	1092	96.5
Rb1_KIAA II-13	146	34_22	1.6	2009	96.2
Rb1_KIAA II_40	146	34_7	1.3	1225	95.9
Rb1_KIAA II_40	146	34_24	1.9	1596	96
Rb1_KIAAneo #293	146	34_11	1.5	1141	95.8
Rb1_KIAAneo #293	146	34_28	1.6	1872	96.1
Rb1_KIAA III_89	146	34_12	1.9	1219	96.1
Rb1_KIAA III_89	146	34_29	2.2	1803	96
Rb1_KIAA III_93	146	34_13	1.8	907	96.4
Rb1_KIAA III_93	146	34_30	1.7	1995	96.1
Rb1_KIAAneo #370	146	34_14	1.8	1381	95.7
Rb1_KIAAneo #370	146	37_1	1.8	735	97.5
Rb1_KIAA IV_85	146	34_15	2	817	95.8
Rb1_KIAA IV_85	146	37_2	2.2	1405	97.7
Rb1_KIAA IV_90	146	34_16	1.6	1772	95.8
Rb1_KIAA IV_90	146	37_3	1.5	599	97.4
Rb1_KIAAneo #2	42	32_1	13.4	402	97.2
Rb1_KIAAneo #2	42	32_13	24.6	676	96.5
Rb1_KIAA II-13	42	32_2	13.2	691	97.4
Rb1_KIAA II-13	42	32_14	19.5	962	96.7
Rb1_KIAA II_40	42	32_3	18.2	265	96.4
Rb1_KIAA II_40	42	32_15	15.3	568	96.3
Rb1_KIAAneo #293	42	32_7	18.8	453	97.3
Rb1_KIAAneo #293	42	32_19	21.9	753	97.1
Rb1_KIAA III_89	42	32_8	14.7	400	96.5
Rb1_KIAA III_89	42	32_20	17.8	817	96.7
Rb1_KIAA III_93	42	32_9	16.8	479	96.6
Rb1_KIAA III_93	42	32_21	19.8	401	98
Rb1_KIAAneo #370	42	32_10	18.9	97	92.3
Rb1_KIAAneo #370	42	32_22	23.2	724	96.7
Rb1_KIAA IV_85	42	32_11	18	871	96.2
Rb1_KIAA IV_85	42	32_24	18.6	549	96.7
Rb1_KIAA IV_90	42	32_12	19.9	676	97
Rb1_KIAA IV_90	42	32_25	18.4	404	97.4
Rb1_KIAAneo #2	85	36_1	4.5	471	88
Rb1_KIAAneo #2	85	36_13	7.8	489	89.8
Rb1_KIAA II-13	85	36_2	5.1	664	88.7
Rb1_KIAA II-13	85	36_14	3	651	88.1
Rb1_KIAA II_40	85	36_3	3	275	88
Rb1_KIAA II_40	85	36_15	4	264	87.5
Rb1_KIAAneo #293	85	36_7	4.9	762	88.1
Rb1_KIAAneo #293	85	36_19	3.6	543	87.9
Rb1_KIAA III_89	85	36_8	3	1448	88.1
Rb1_KIAA III_89	85	36_20	6	826	88
Rb1_KIAA III_93	85	36_9	40.7	932	87.8
Rb1_KIAA III_93	85	36_21	3.3	550	88.4
Rb1_KIAAneo #370	85	36_10	24.4	522	87.8
Rb1_KIAAneo #370	85	44_30	21.3	1081	87.1
Rb1_KIAA IV_85	85	36_11	10.5	613	88
Rb1_KIAA IV_85	85	36_24	19.3	1056	88.1
Rb1_KIAA IV_90	85	36_12	3.7	403	88
Rb1_KIAA IV_90	85	36_25	3.9	548	88.2
Rb1_KIAAneo #50	146	34_8	1.6	924	96.2
Rb1_KIAAneo #50	146	34_25	2.6	1015	96.2
Rb1_KIAA I_6	146	34_9	1.4	1384	95.9
Rb1_KIAA I_6	146	34_26	1.5	2054	96.2
Rb1_KIAA I_11	146	34_10	1.3	1337	96.6
Rb1_KIAA I_11	146	34_27	1.7	1216	96.1
Rb1_KIAAneo #50	42	32_4	14.8	472	96.5
Rb1_KIAAneo #50	42	32_16	24.4	612	97.9
Rb1_KIAA I_6	42	32_5	18	248	96.5
Rb1_KIAA I_6	42	32_17	18	500	97
Rb1_KIAA I_11	42	32_6	18.5	625	96.5
Rb1_KIAA I_11	42	32_18	16.5	938	96.3
Rb1_KIAAneo #50	85	44_27	7.1	455	88
Rb1_KIAAneo #50	85	36_16	5.1	1027	90.6
Rb1_KIAA I_6	85	44_28	53.4	914	90.1
Rb1_KIAA I_6	85	36_17	4.9	525	88
Rb1_KIAA I_11	85	44_29	3.9	607	86.5
Rb1_KIAA I_11	85	36_18	4.2	869	87.9
III_89 P70	146	37_4	2.1	902	97.3
III_93 P70	146	37_5	2.2	465	97.5
IV_85 P70	146	37_6
IV_90 P70	146	37_7	2	1054	97.5
III_89 P70	42	34_26	20.6	414	92.3
III_93 P70	42	34_27	17.8	345	92.7
IV_85 P70	42	34_28	19.5	373	92.5
IV_90 P70	42	34_29	16.7	354	92.2
III_89 P70	85	36_26	3.3	2531	88.4
III_93 P70	85	36_27	3.4	1473	88.4
IV_85 P70	85	36_28	2.9	1323	88.2
IV_90 P70	85	36_29	4.7	1040	88.3
